# Supplementary material
Source: PubMed Central journal article supplement (PMC1959435)

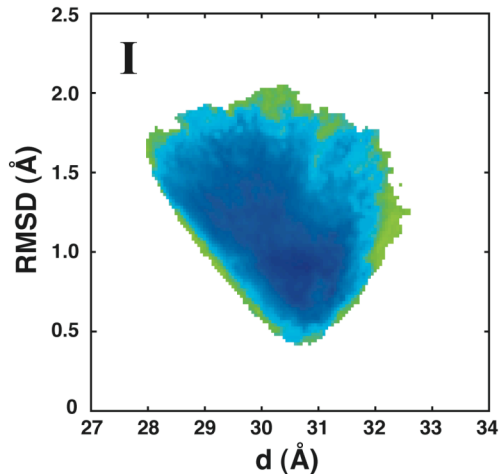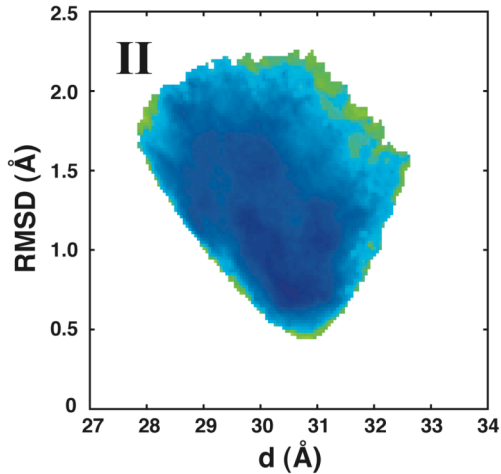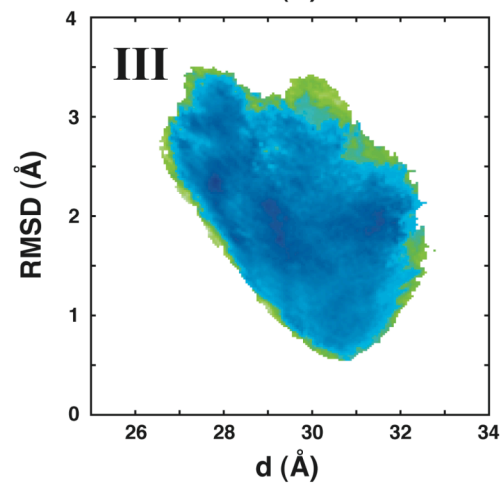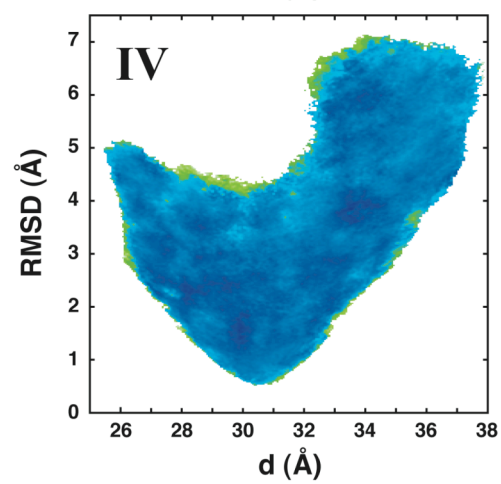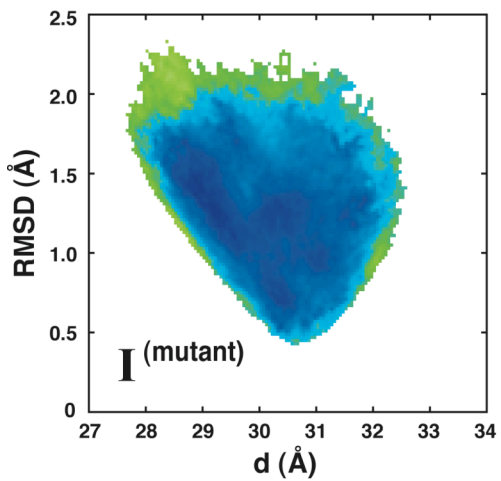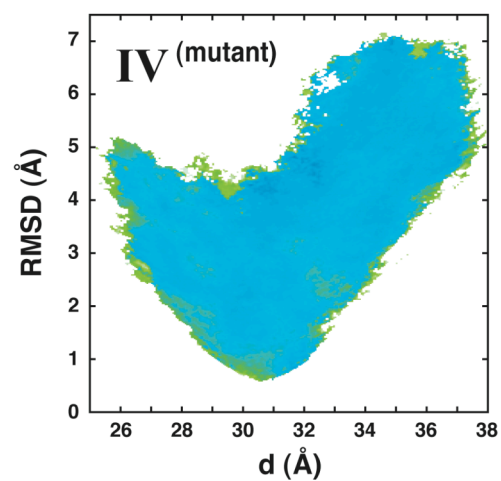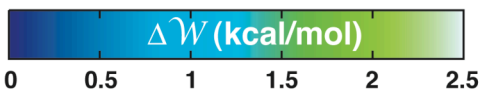

Supplement: pnas_0704041104_1.pdf [file pnas_0704041104_1.pdf]
